# Supplementary material for: Ultrathin dense LiF coverage coupled with a near-surface gradient fluorination lattice enables fast-charging long-life 4.6 V LiCoO2
Source: Royal Society of Chemistry journal article supplement (doi:10.1039/d3ee03464j), 2024-01-01
Supplement: d3ee03464j1.pdf [file d3ee03464j1.pdf]

## † Supporting Information

### **Ultrathin dense LiF coverage coupled with a near-surface gradient fluorination lattice enables fast-charging long-life 4.6 V LiCoO<sub>2</sub>**

Zhihong Bi <sup>a, d, ‡</sup>, Zonglin Yi <sup>b, ‡</sup>, Liangzhu Zhang <sup>f</sup>, Gongrui Wang <sup>a, e</sup>, Anping Zhang <sup>a, d</sup>, Shihao Liao <sup>a</sup>, Qinghe Zhao <sup>c</sup>, Zhangquan Peng <sup>j</sup>, Li Song <sup>k</sup>, Yi Wang <sup>a, d</sup>, Zhiwei Zhao <sup>j</sup>, Shiqiang Wei <sup>k</sup>, Wenguang Zhao <sup>c</sup>, Xiaoyu Shi <sup>a, e</sup>, Mingrun Li <sup>a</sup>, Na Ta <sup>a</sup>, Jinxing Mi <sup>g</sup>, Shunning Li <sup>c</sup>, Prateek Das <sup>a, e</sup>, Yi Cui <sup>h, i</sup>, Chengmeng Chen <sup>\*, b</sup>, Feng Pan <sup>\*, c</sup>, and Zhong-Shuai Wu <sup>\*, a, e</sup>

<sup>a</sup> State Key Laboratory of Catalysis, Dalian Institute of Chemical Physics, Chinese Academy of Sciences, 457 Zhongshan Road, Dalian 116023, China

<sup>b</sup> CAS Key Laboratory of Carbon Materials, Institute of Coal Chemistry, Chinese Academy of Sciences, Taiyuan, 030001, China

<sup>c</sup> School of Advanced Materials, Peking University, Shenzhen Graduate School, Shenzhen 518055, China

<sup>d</sup> University of Chinese Academy of Sciences, 19 A Yuquan Road, Shijingshan District, Beijing 100049, China

<sup>e</sup> Dalian National Laboratory for Clean Energy, Chinese Academy of Sciences, 457 Zhongshan Road, Dalian 116023, China

<sup>f</sup> School of Materials Science and Engineering, East China University of Science and Technology, Shanghai 200237, China

<sup>g</sup> State Key Joint Laboratory of Environment Simulation and Pollution Control, School of Environment, Tsinghua University, Beijing 100084, China

<sup>h</sup> Vacuum Interconnected Nanotech Workstation, Suzhou Institute of Nano-Tech and Nano-Bionics, Chinese Academy of Sciences, 215123, Suzhou, China

<sup>i</sup> School of Nano Technology and Nano Bionics University of Science and Technology

of China, 230026, Hefei, China

<sup>j</sup> Laboratory of Advanced Spectro-Electrochemistry and Li-Ion Batteries, Dalian Institute of Chemical Physics, Chinese Academy of Sciences, Dalian 116023, China

<sup>k</sup> National Synchrotron Radiation Laboratory, CAS Center for Excellence in Nanoscience, University of Science and Technology of China, Hefei 230029, P. R. China

<sup>‡</sup> *These authors contributed equally: Zhihong Bi, Zonglin Yi*

\*Corresponding authors. E-mails: ccm@sxicc.ac.cn (C.M. Chen);

panfeng@pkusz.edu.cn (F. Pan); wuzs@dicp.ac.cn (Z.-S. Wu)

## **Methods**

### **Materials synthesis**

The commercial 4.45 V pristine LCO (named as P-LCO, purchased from JOHN LONG in Beijing) was uniformly mixed with LiPF<sub>6</sub>-containing absolute ethanol solution at a mass ratio of 100:1 and continuously stirred until it was completely dried. Next, the composite electrodes were further dried in a blast drying oven at 90 °C for 6 h (named as LCO@LPF-90), and then transferred to a muffle furnace, which was heated to different temperatures of 400, 600 and 700 °C at a rate of 5 °C/min and subjected to thermal fluorination for 2 h. Finally, the fluorinated LCO samples were obtained, and correspondingly named as F-LCO-400, F-LCO, and F-LCO-700, respectively.

### **Materials characterizations**

The morphologies, phases and crystallographic structures were characterized by XRD using a parallel-beam XRD instrument (Smartlab, Rigaku, with Cu K $\alpha$  of wavelength 1.542 Å). The types and contents of doping elements of commercial LCO were determined by ICP-OES 7300DV (PerkinElmer). The surface chemistry was analyzed by XPS (Thermo Scientific K $\alpha$  spectrometer). TEM samples were prepared by dual beam focused ion beam electron microscopy (FIB, Helios 450HP, FEI) using a 2-30 kV Ga ion beam. STEM (ARM200, JEOL; JEM-3200FS, JEOL; ARM300, JEOL) coupled with EELS/EDS were performed at different voltages (60 kV, 200 kV) to collect scanning transmission electron microscopy images for atomic and structural analysis, elemental and spectral analysis. The soft-XAS (SXAS) was performed at beamline 02B and XMCD Experimental Station (SSRF). Total electron yield (TEY)

mode (10 nm for probe depth) was used to collect the O K-edge SXAS spectra. ESR measurements were performed at 9.45 GHz with a Bruker spectrometer at the temperature of 100 K using an Oxford Instruments ESR 9 liquid nitrogen cryostat. TOF-SIMS analysis was performed by a TOF. SIMS 5 spectrometer (ION-TOF GmbH) to analyze the surface chemical structure and for depth profiling. All detected secondary ions of interest had a mass resolution of  $>5000$  and possessed negative polarity. A pulsed 30 keV  $\text{Bi}^{1+}$  (20 ns) ion beam set at a high current mode was employed for depth profiling and a 500 eV  $\text{Cs}^+$  (negative) ion beam was utilized for the sputtering of the cycled electrodes with a typical sputtered area ( $300\ \mu\text{m} \times 300\ \mu\text{m}$ ). The typical analyzed area was  $50\ \mu\text{m} \times 50\ \mu\text{m}$ . The instruments used for in-situ differential electrochemical mass spectrometry (DEMS) experiments include commercial quadrupole mass spectrometer (Hiden HPR-20) equipped with turbo molecular pump (Pfeiffer vacuum) and rotary pump (Edwards vacuum), self-made cold trap, an electrochemical cell (EL CELL GmbH) and a digital mass flowmeter.

## **Electrochemical measurements**

For the coin-type half cells, the cathode composite slurry was prepared by first mixing LCO active materials (80%), Ketjen black (10%, ECP600JD) and poly (vinylidene fluoride) (10%, PVDF) in N-methyl-2-pyrrolidone (NMP). Then, the composite slurry obtained was coated onto aluminum foil and then dried at  $100\ ^\circ\text{C}$  for 12 h under vacuum. The cathode mass loading was controlled at  $2.5\text{-}3\ \text{mg cm}^{-2}$ . The assembly of Li||LCO battery was completed using CR-2016 coin-type cells in an argon glove box (both of  $\text{O}_2$  and  $\text{H}_2\text{O}$  contents below 0.1 ppm), including the cathode (diameter 12 mm),

polypropylene separator (diameter 19 mm, Celgard 2500), lithium metal foil (diameter 15.6 mm), electrolyte (LB-372: 1M LiPF<sub>6</sub> in fluoroethylene carbonate (FEC): methyl (2,2,2-trifluoroethyl) carbonate (FEMC)) purchased from Suzhou DoDo Chem Network. All the coin cells were evaluated using a Land CT3002A battery test system in a constant current mode between 3.0 and 4.6 V (vs. Li<sup>+</sup>/Li) at 28 °C and 45 °C. The galvanostatic intermittent titration technique (GITT) was employed after 1 cycle by applying a pulse current of 0.1 C for 20 min with a time interval of 2 h in the voltage range of 3-4.6 V on a Land CT3002A battery test system. The cyclic voltammetry (CV) measurements, and electrochemical impedance spectroscopy (EIS) tests (100 kHz to 0.01 Hz, 5 mV) were measured on an electrochemical workstation (CHI760E, Shanghai Chenchua, China).

To evaluate room-temperature OER activity in aqueous solutions, electrocatalytic measurements were performed in a three-electrode cell using a glassy carbon rotating disk electrode (diameter: 3 mm) on an electrochemical workstation (CHI760E, Shanghai Chenchua, China). The Ag/AgCl was used as the reference electrode, and Pt wire was used as the counter electrode. 1 M KOH aqueous solution with continuous O<sub>2</sub> bubbling was used as the electrolyte. The remaining test steps were carried out as described in the previous literature.<sup>23</sup> Linear sweep voltammetry was conducted at 5 mV s<sup>-1</sup>.

The pouch-type graphite||LCO full cells were completed in a dry room. The anode composite slurry was prepared by mixing graphite (94.3 wt%), acetylene black (1 wt%), styrene butadiene rubber (3.5 wt%, SBR) and carboxy methyl cellulose sodium (1.2

wt%, CMC) in deionized water. Then, the composite slurry obtained was coated onto the copper foil current collector and dried at 120 °C for 24 h under vacuum. The LCO cathode composite slurry was prepared by dispersing active materials (96%), ECP600JD (2%) and PVDF (2%) in NMP, followed by coating onto an Al foil current collector and drying at 120 °C for 24 h under vacuum. The graphite||LCO full cell consisted of LCO cathode, polypropylene separator, and graphite anode. LB-372 electrolyte consumption was about  $\sim 3.5 \text{ g Ah}^{-1}$ . The mass loading of the LCO electrode was about  $12 \text{ mg cm}^{-2}$  (on both sides of the Al foil current collector). The N/P ratio (negative to positive capacity ratio) was controlled around 1.05. For the formation process, the assembled pouch-type full cells were first put through two complete electrochemical cycles before the cycling specified in the main text. During this process, the pouch cells were first charged at 0.02 C for 2 h. After keeping for 5 min, the full cells were charged to 4.5 V at a constant current mode at 0.2 C and then constant voltage at 4.5 V until the current dropped to 0.02 C. Then, the pouch cells were discharged to 3.0 V at 0.2 C during the 1st discharge process. For the 2nd cycle, the pouch cells were charged to 3.85 V at 0.2 C and rested at 45 °C for 24 h to complete the formation process. The subsequent rate performance and cyclability by GCD profiles were conducted at a voltage window of 3.0–4.5 V. All pouch cell electrochemical tests were performed on a Land CT3001k battery test system.

## **Computational Details**

Spin-polarized density functional theory (DFT) calculations were conducted by Vienna ab initio Simulation Package (VASP) 5.4.<sup>1</sup> The generalized gradient

approximation (GGA) and the Perdew–Burke–Ernzerhof (PBE) exchange–correlation function describe the exchange–correlation interaction.<sup>2</sup> The ion–electron interactions are described by the frozen-core projector augmented wave (PAW) method.<sup>3</sup> The GGA+U method was employed with Coulomb repulsion  $U = 3.91$  eV.<sup>4</sup> The LCO bulk structure was constructed with dimensions  $5.66 \times 5.66 \times 14.13$ . To investigate the effect of fluorination, one of the O atoms was substituted by F atom in bulk LCO. A  $3 \times 3 \times 1$  gamma-centered  $k$ -points grid was used for sampling the Brillouin zones in heterostructures, while  $5 \times 5 \times 2$  in bulk LCO.  $9 \times 9 \times 3$  gamma-centered  $k$ -points grids were used for self-consistent field (SCF) calculations in DFT. The plane wave basis energy cutoff was set to 550 eV. The convergence criteria are 0.04 eV/Å for maximum force, and  $1 \times 10^{-6}$  eV for energy changes. Electronic structure analysis was conducted with the help of Vaspkit package. The climbing image nudged elastic band (CI-NEB) method is conducted for simulating the migration of O atoms in pristine and F doped bulk LCO, with three climbing images between initial and final states generated through the transition state tools for VASP (VTST code).

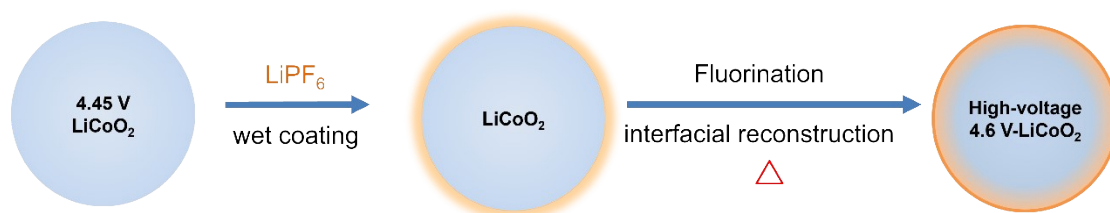

**Supplementary Scheme 1** | Fluorination interfacial reconstruction scheme of 4.6 V F-LCO derived from 4.45 V commercial P-LCO.



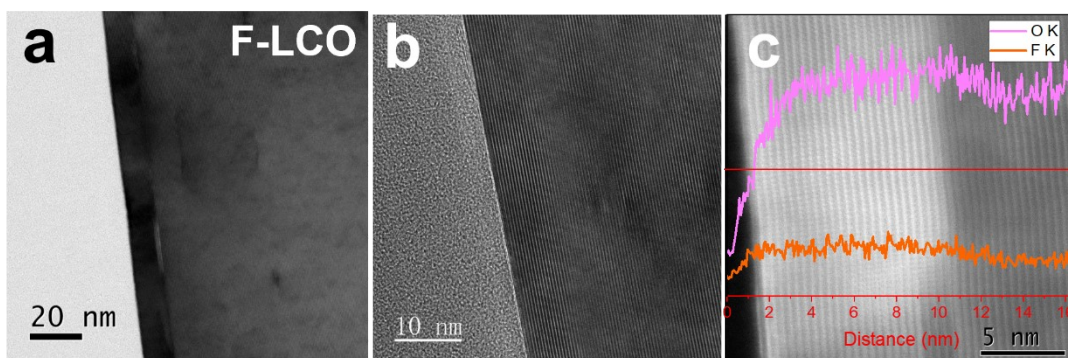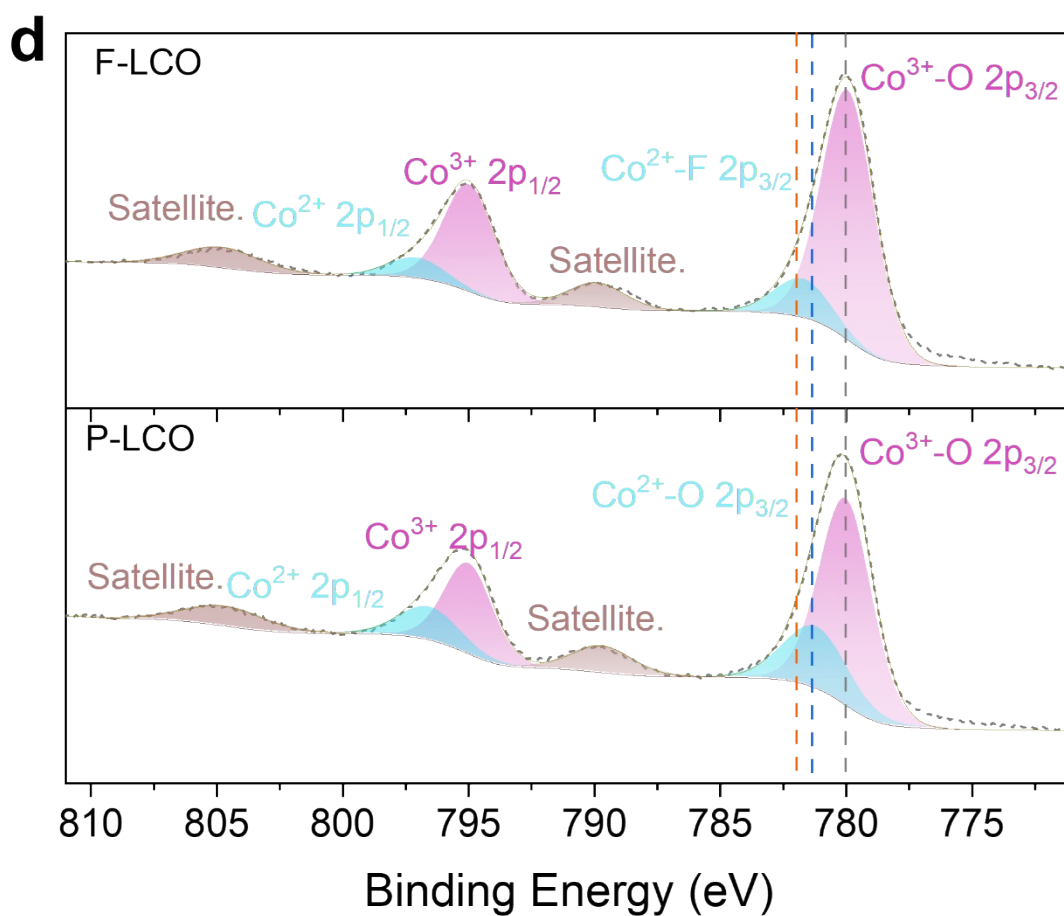

**Supplementary Figure 1** | (a,b) STEM-ABF images of F-LCO, and (c) high resolution STEM-HAADF image of F-LCO, with EDS Line scan signals of O K-edge and F K-edges across from the surface to the bulk phase of F-LCO particle. (d) Co 2p XPS spectra from F-LCO and P-LCO, after surface fluorination, the position of Co<sup>2+</sup> shifts to a high binding energy and transforms from Co-O to Co-F.

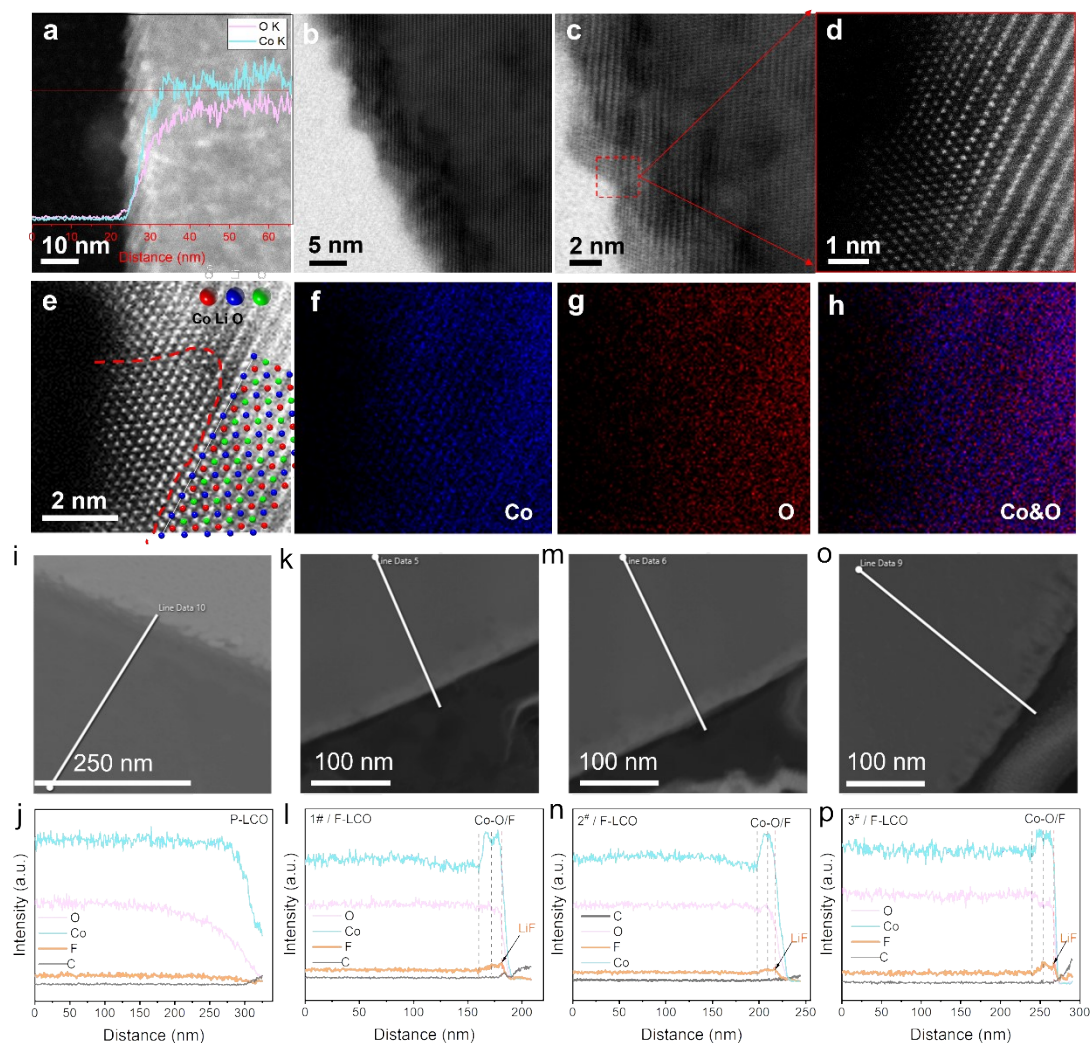

**Supplementary Figure 2** | (a) STEM-HAADF image of P-LCO (with EDS mapping area in the STEM-HAADF image, and line scan signal counts across from the surface to the bulk phase of LCO particle). (b-d) High resolution STEM-HAADF images of P-LCO by spherical aberration corrected transmission electron microscope at different nanoscale. (e) Atomic-resolution STEM HAADF image of subsurface for P-LCO at 2 nm scale and the ordered atomic structure model features of (003) planes corresponding to the image (d) (the zone axis is  $[-2 -1 0]$ ). (f-h) EELS mapping of (f) Co and (g) O and (h) their overlay from image (e). (i-p) STEM-HAADF image and corresponding EDS line scan signal counts across from the surface to the bulk phase of LCO particles,

(i-j) P-LCO, and (k-p) F-LCO.

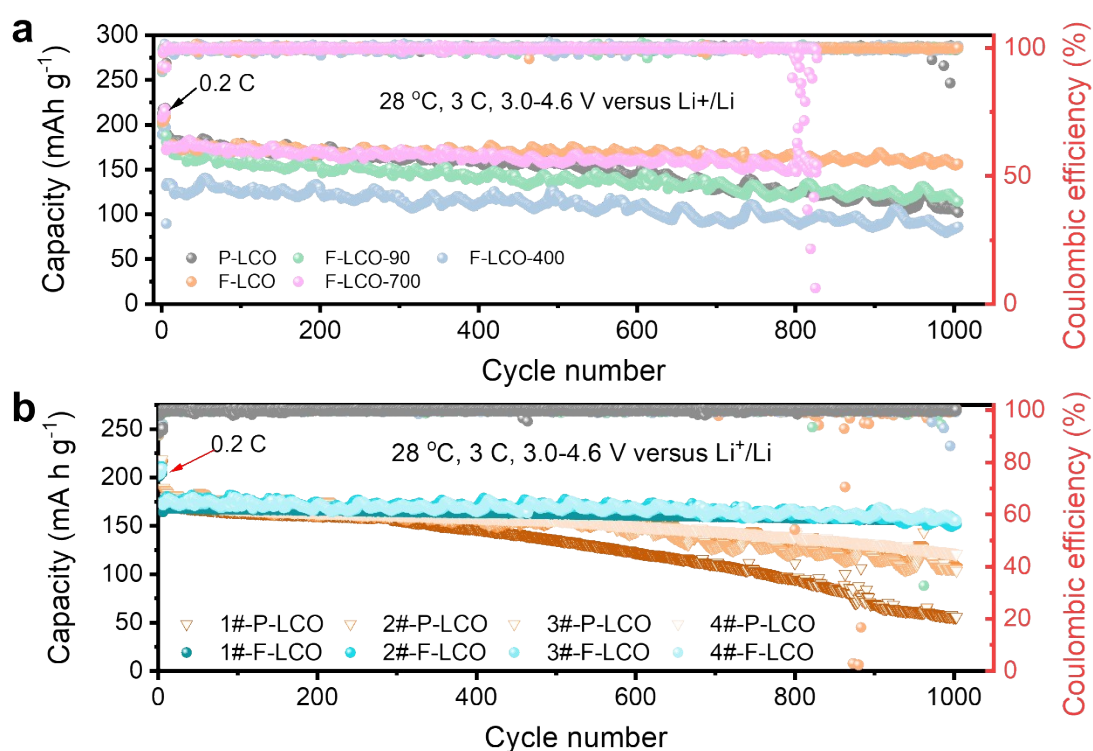

**Supplementary Figure 3** | (a) Long-term cycling performance of P-LCO, F-LCO and F-LCO-90, F-LCO-400, and F-LCO-700 obtained at a high rate of 3 C in the voltage of 3.0-4.6 V (vs. Li<sup>+</sup>/Li). (b) Long-term cycling performance of multiple different P-LCO and F-LCO cathodes at 3C.

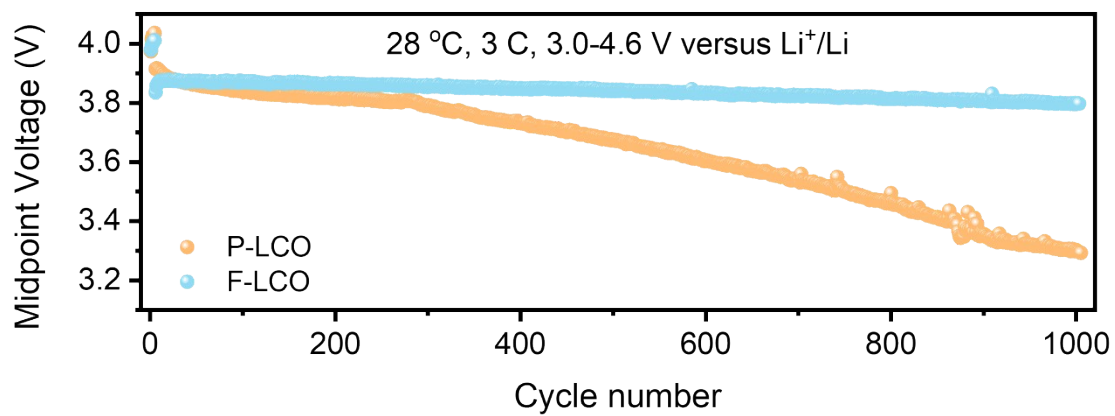

**Supplementary Figure 4** | The corresponding discharge midpoint voltages of F-LCO and P-LCO for 1000 cycles obtained at 3 C.

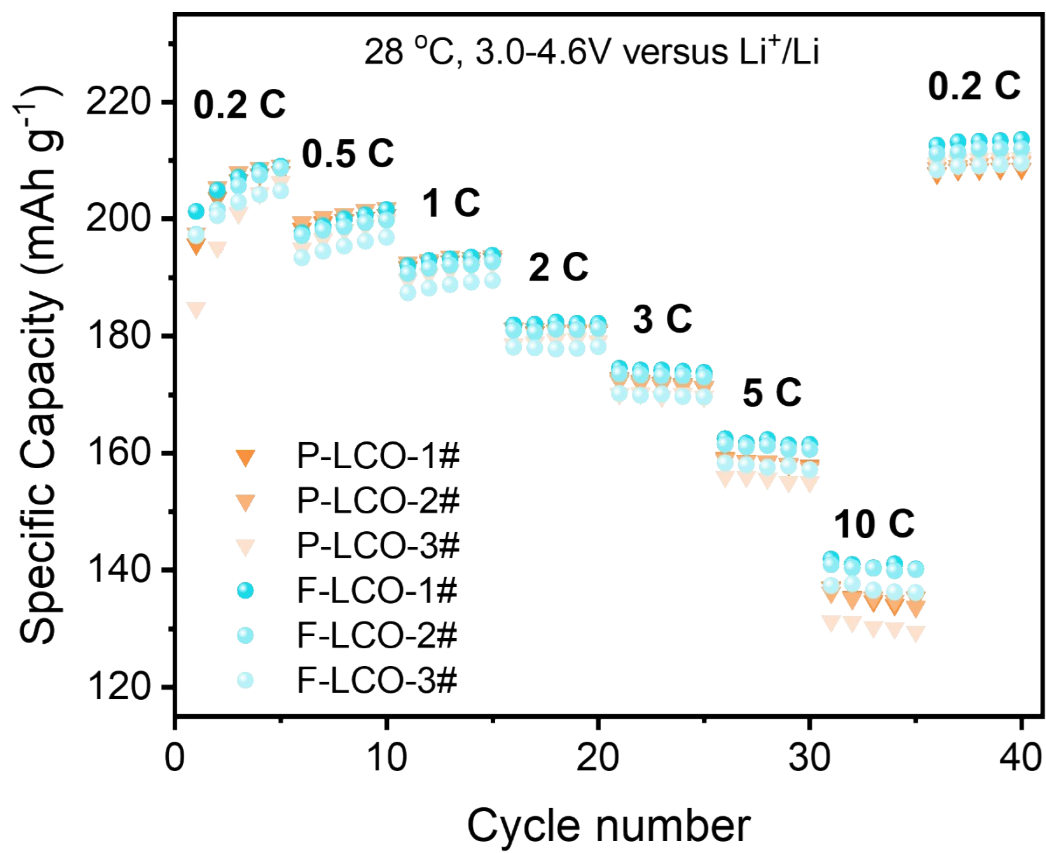

**Supplementary Figure 5** | Rate performance of F-LCO and P-LCO between 3.0 and 4.6 V in multiple half cells.

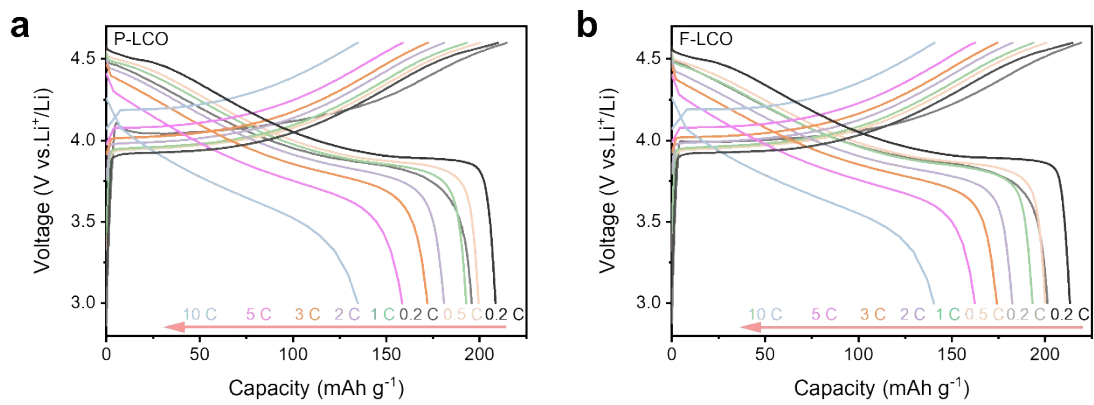

**Supplementary Figure 6** | The GCD profiles of (a) P-LCO and (b) F-LCO at different rates between 3.0 and 4.6 V.

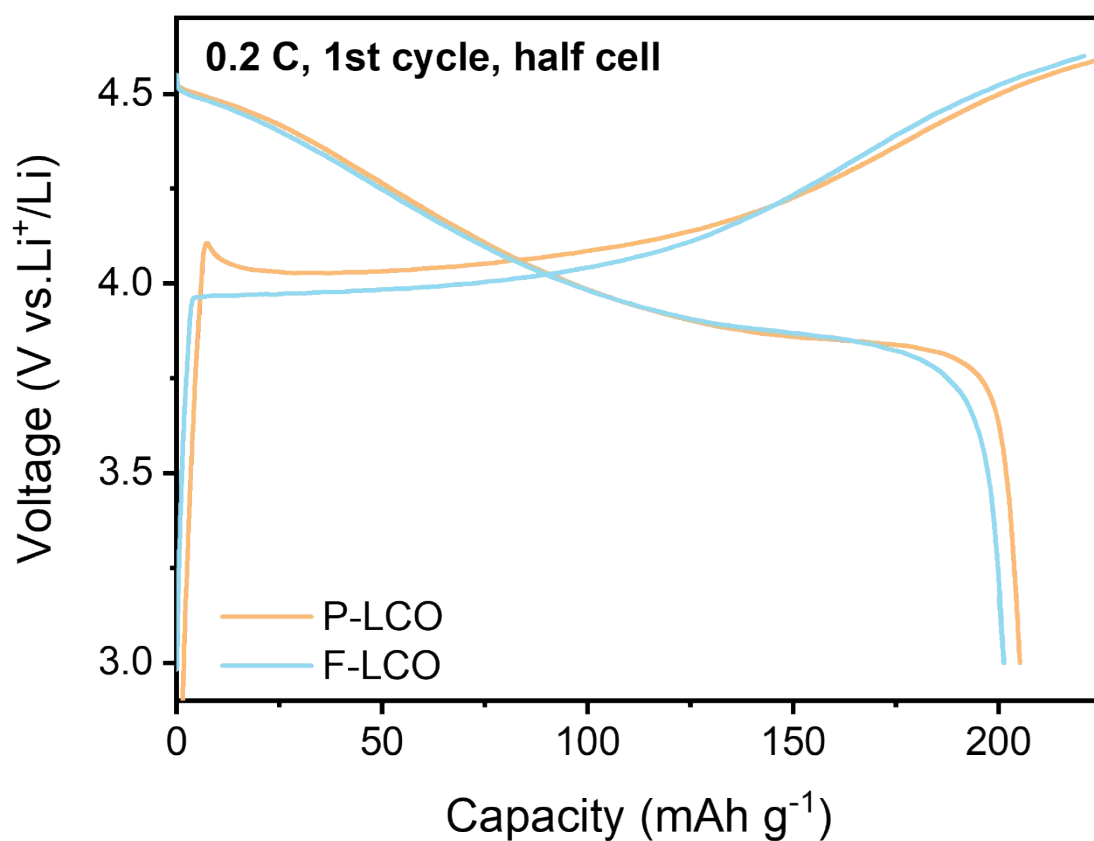

**Supplementary Figure 7** | The GCD profiles of F-LCO and P-LCO cathodes tested at 0.2 C within 3.0-4.6 V in half-cells.

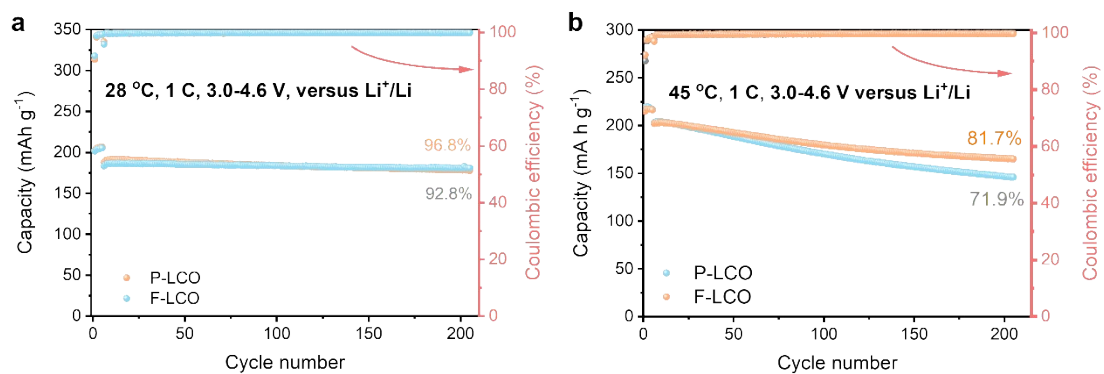

**Supplementary Figure 8** | Cycling performance of F-LCO and P-LCO at 1 C under (a) 28 °C and (b) 45 °C.



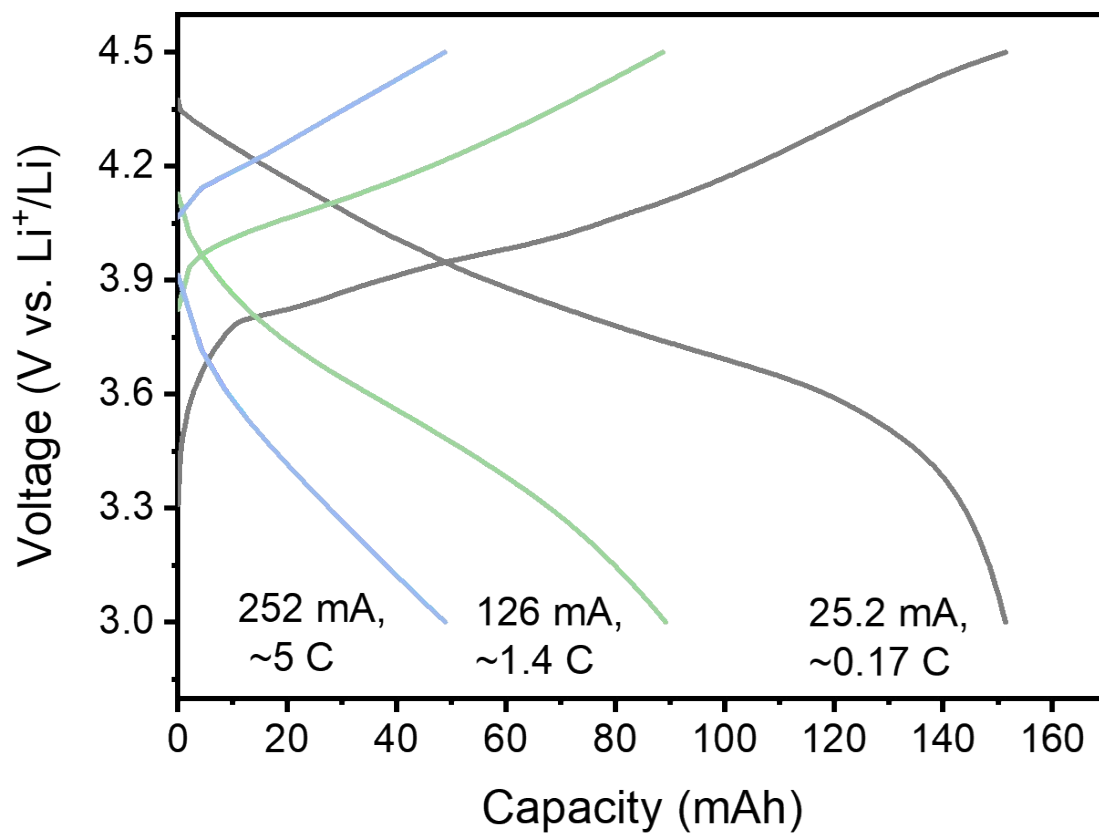

**Supplementary Figure 9** | The GCD profiles of graphite||F-LCO pouch-type full cells measured at 0.1 C, 0.5 C, and 1 C within 3.0-4.5 V.

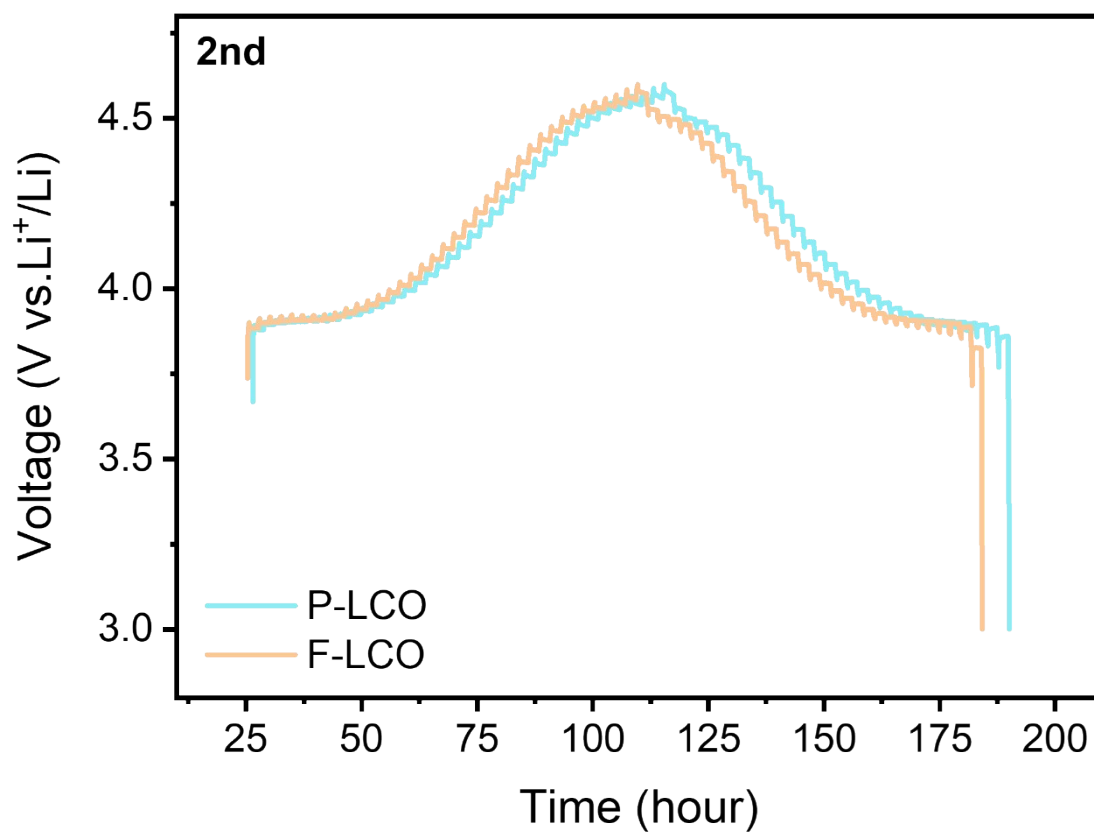

**Supplementary Figure 10** | The GITT curves of P-LCO and F-LCO at 0.2 C in the voltage of 3.0-4.6 V.

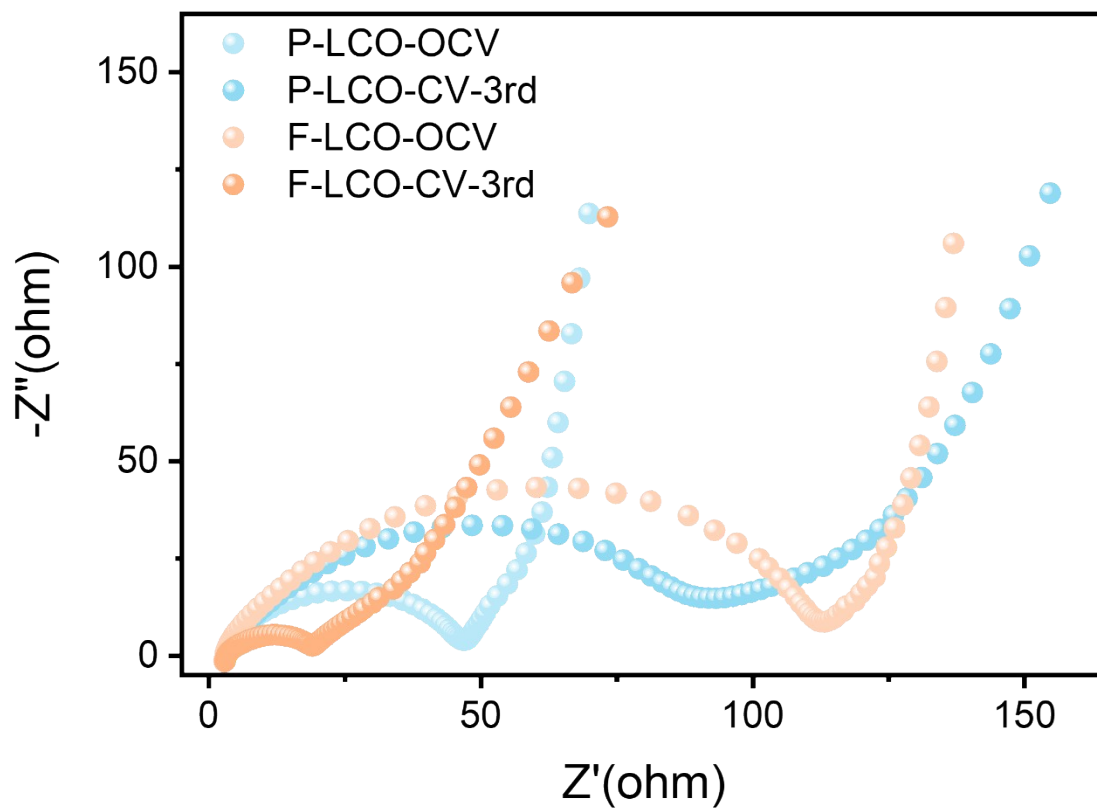

**Supplementary Figure 11** | Nyquist plots of Li||LCO (vs.  $\text{Li}^+/\text{Li}$ ) batteries for P-LCO and F-LCO at open circuit voltage (OCV) and after three cycles CV curves at  $0.1 \text{ mVs}^{-1}$ .

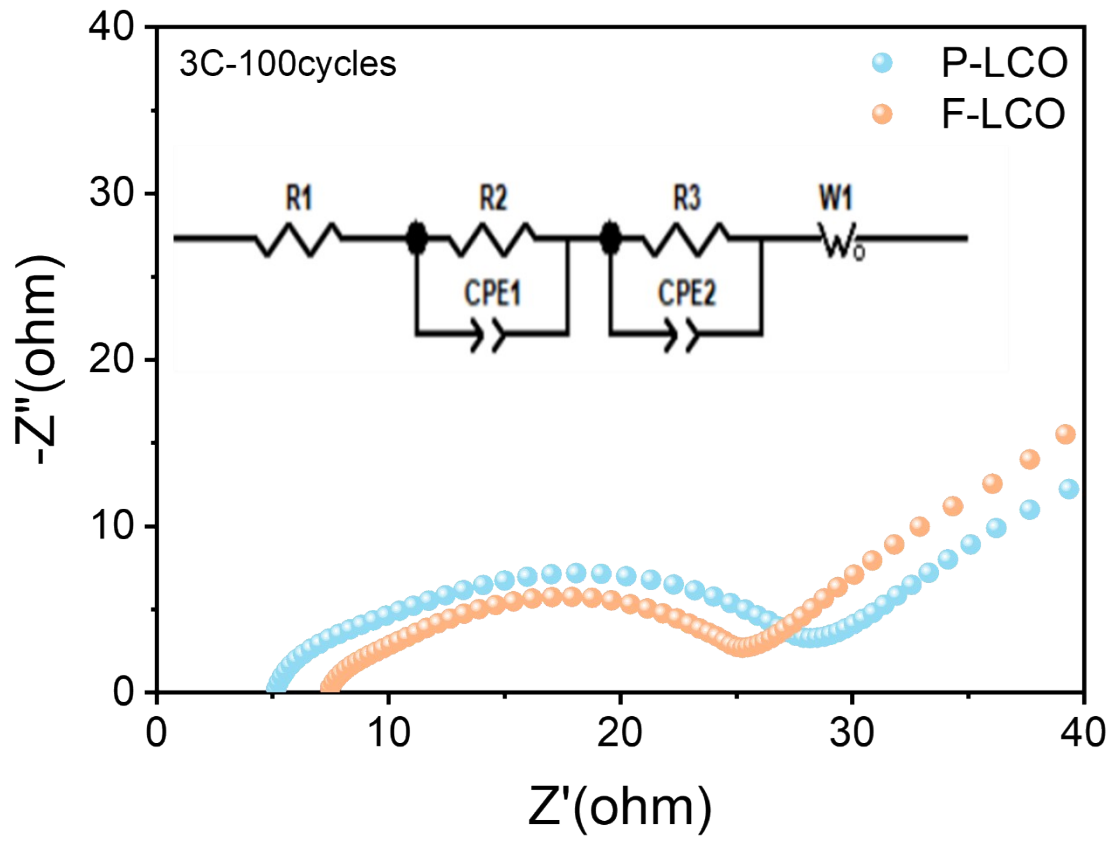

**Supplementary Figure 12** | Nyquist plots of F-LCO and P-LCO after 100 cycles at 3

C.

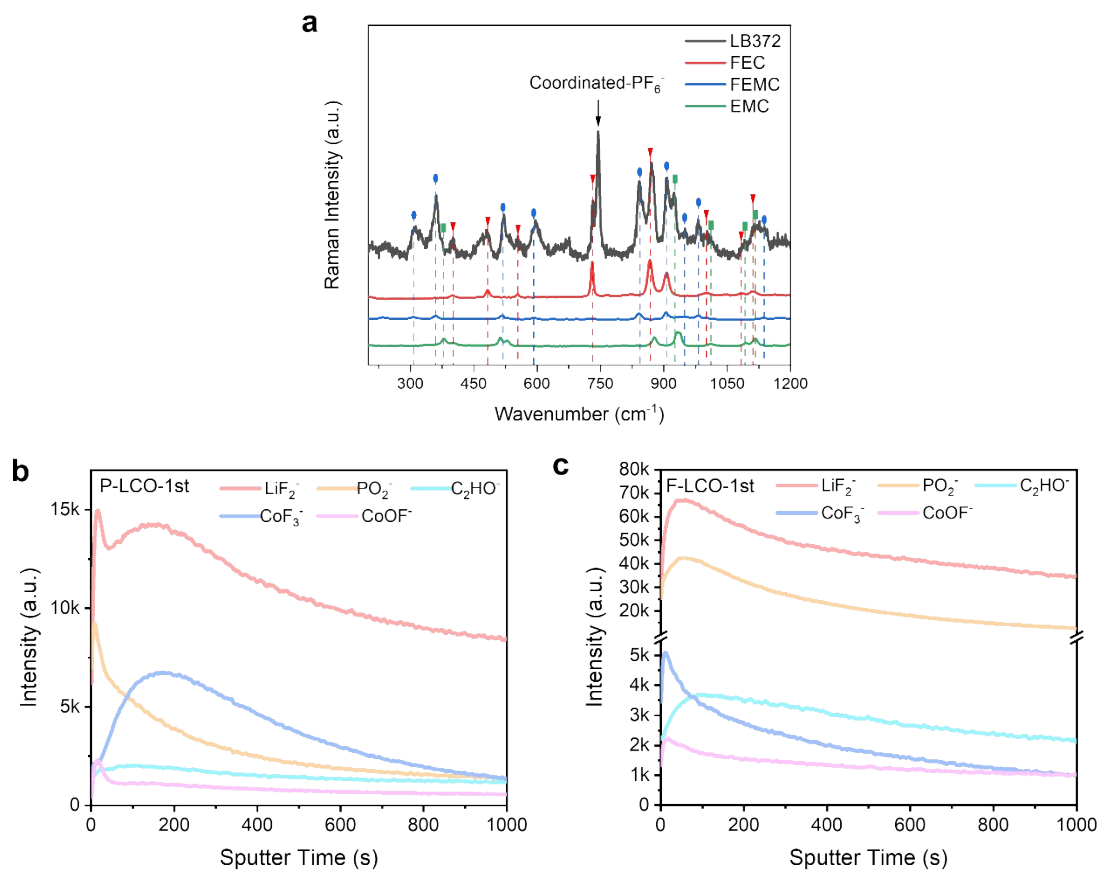

**Supplementary Figure 13** | (a) Raman characterization of electrolyte composition. (b,c) TOF-SIMS depth profiles of interphase fragments acquired on the cycled (b) P-LCO and (c) F-LCO cathodes, illustrating the different composition of CEI layer, retrieved from coin-type half cells after the 1st cycle at 0.2 C.

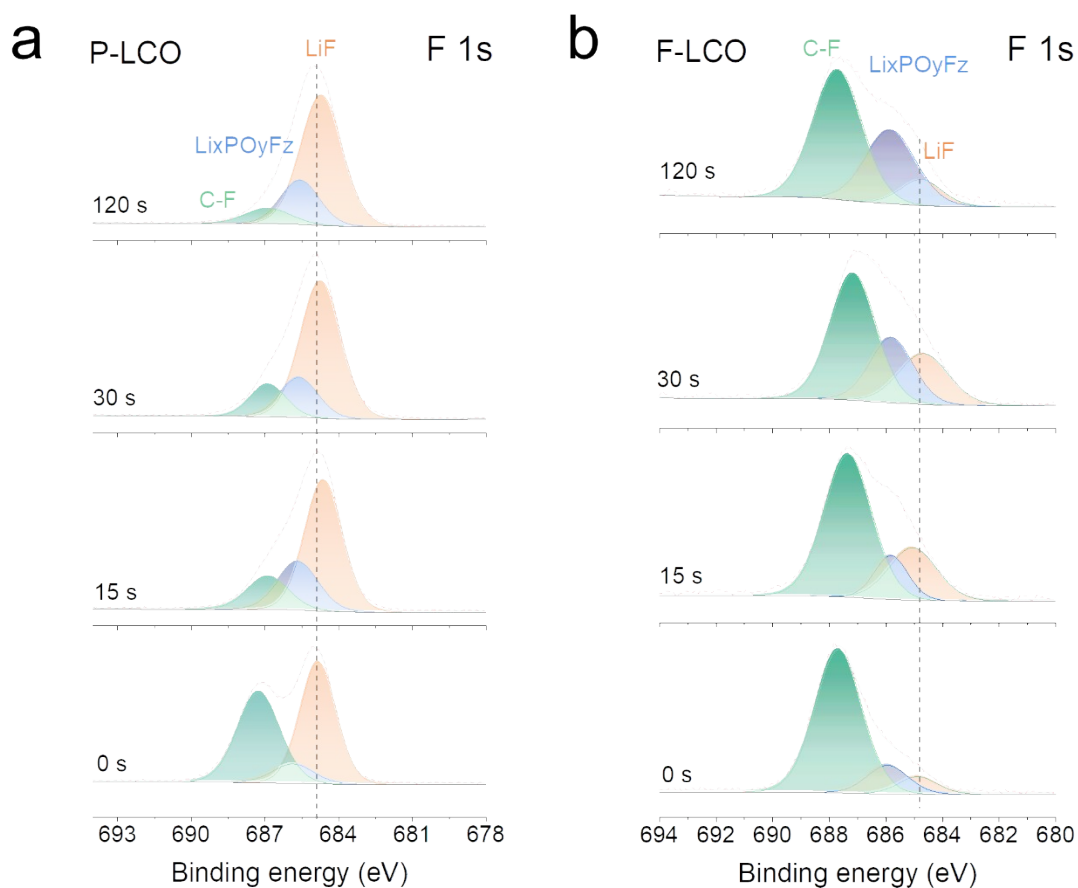

**Supplementary Figure 14** | The F 1s XPS spectra for analyzing the chemical composition of cycled (a) P-LCO and (b) F-LCO cathodes after 1000 cycles. The significant LiF generated by  $\text{LiPF}_6$  decomposition suggests that P-LCO interfacial instability triggers a sustained side reaction, while F-LCO exhibits a relatively stable low LiF signal.

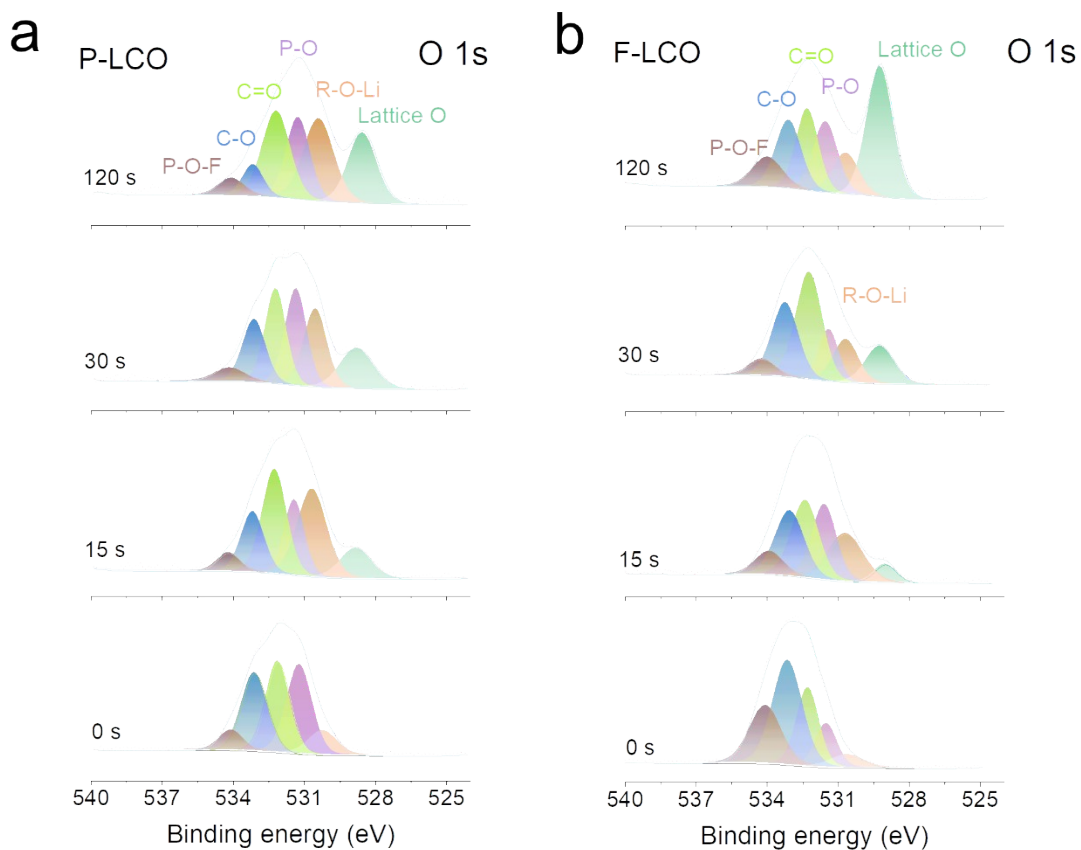

**Supplementary Figure 15** | The O 1s XPS spectra for chemical composition analysis of the cycled (a) P-LCO and (b) F-LCO cathodes after 1000 cycles. The relative strength of the lattice oxygen signal at 120 s qualitatively shows that the P-LCO surface produces the thicker CEI layer than that of F-LCO.

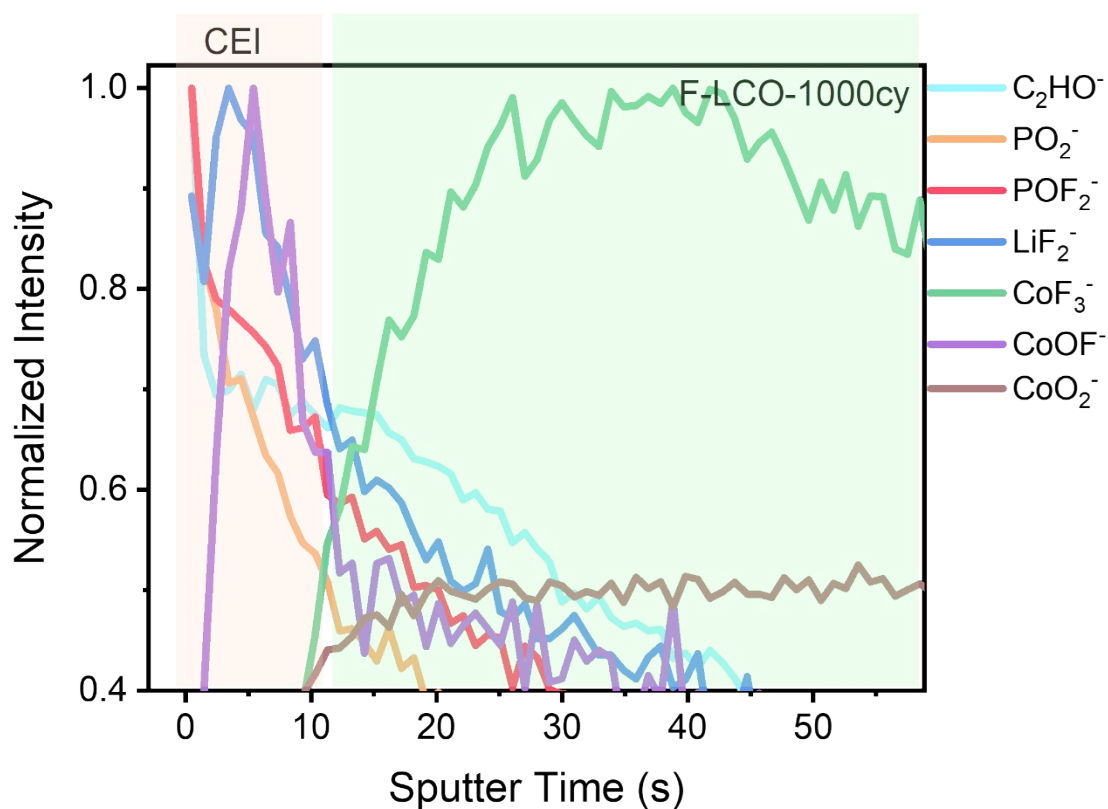

**Supplementary Figure 16** | Normalized TOF-SIMS depth profiles of representative species on cycled F-LCO cathodes after 1000 cycles. The maximum normalized intensity of  $CoOF^-$  lies between  $LiF_2^-$  and  $CoF_3^-$ , indicating the formation of a Co-O-F-heterogeneous bonding interface between LiF and LCO.



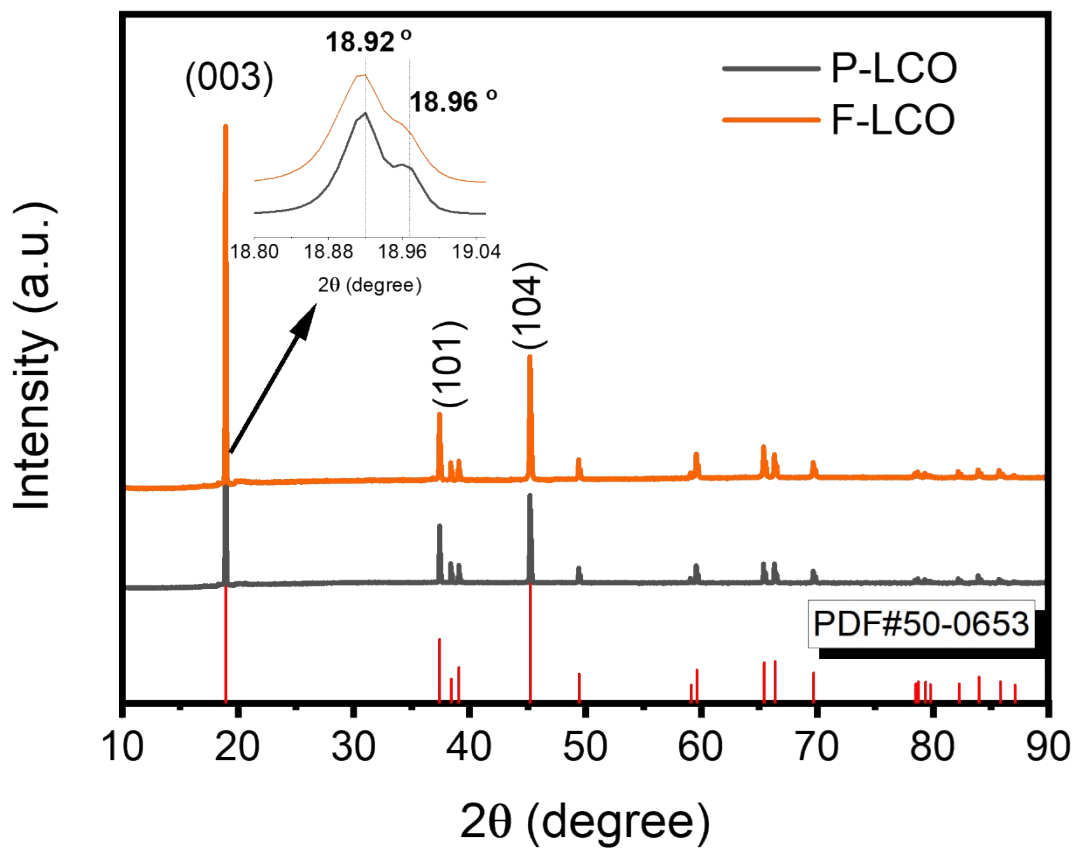

Supplementary Figure 17| The XRD patterns of P-LCO and F-LCO.

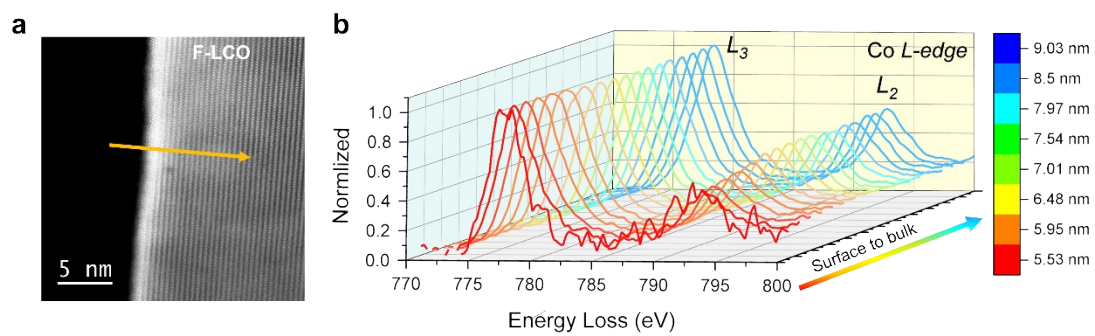

**Supplementary Figure 18** | (a) EELS line scan for F-LCO under high magnification STEM-HAADF mode and (b) 3D EELS spectra of Co  $L$ -edges after being normalized to  $L_3$ -edge.

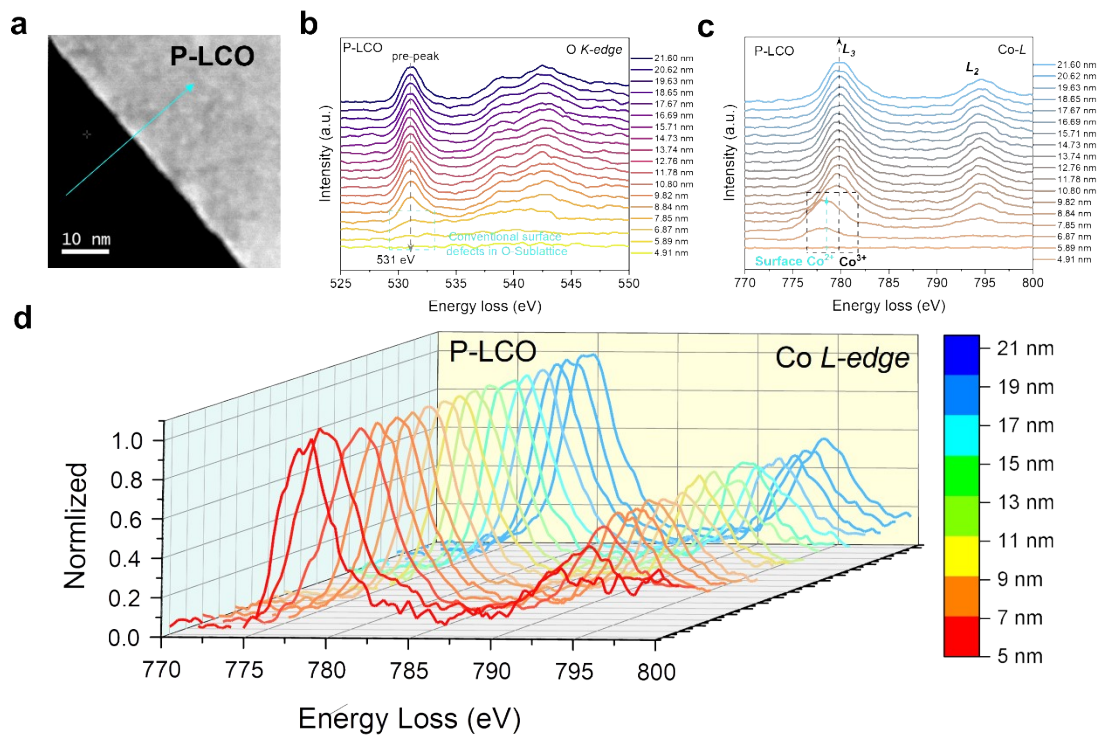

**Supplementary Figure 19** | (a) STEM-HAADF image of P-LCO particle after FIB fabrication. The lines in the figure represent the EELS line-scan. (b,c) EELS spectra of O K-edges in (b) and Co  $L$ -edges in (c) collected from P-LCO particle. (d) 3D EELS spectra of Co  $L$ -edges after being normalized to  $L_3$ -edge of P-LCO particle.

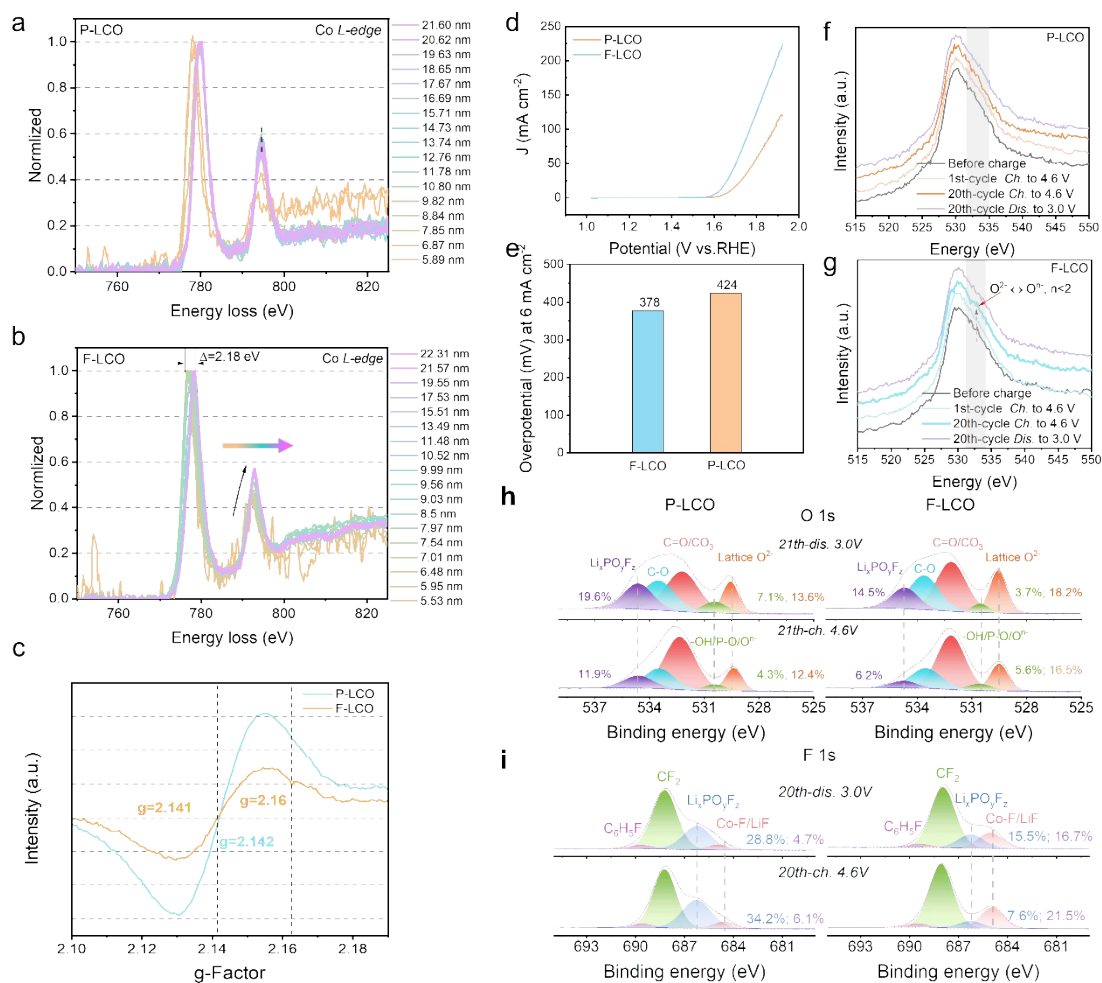

**Supplementary Figure 20** | Normalized EELS spectra of Co *L*-edge (a) P-LCO and (b) F-LCO. (c) Perpendicular-mode EPR spectra of P-LCO and F-LCO electrodes at powder state. (d-e) OER electrocatalytic performances of P-LCO and F-LCO in 1 M KOH aqueous solution at room temperature. (d) Linear sweep voltammetry (LSV) curves at a scan rate of 5 mV s<sup>-1</sup>. Potentials are vs. reversible hydrogen electrode (RHE). (e) Measured overpotential at 6 mA cm<sup>-2</sup> current density. (f-g) O K-edge SXAS spectra of (f) P-LCO and (g) F-LCO in different states of charge under TEY modes. (h-i) XPS analysis of (h) O 1s and (i) F 1s for P-LCO and F-LCO cathodes under 0.2 C charge/discharge state after 20 cycles.

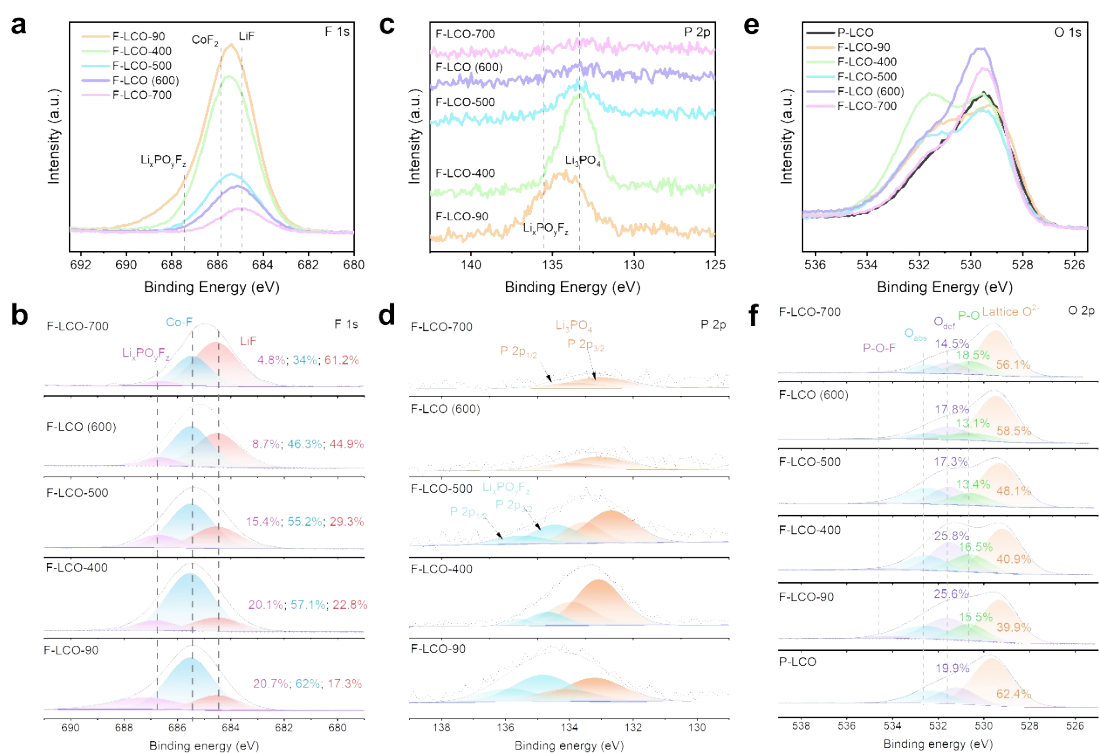

**Supplementary Figure 21** | XPS analysis of (a-b) F 1s, (c-d) P 2p, and (e-f) O 1s for different LCO cathodes.

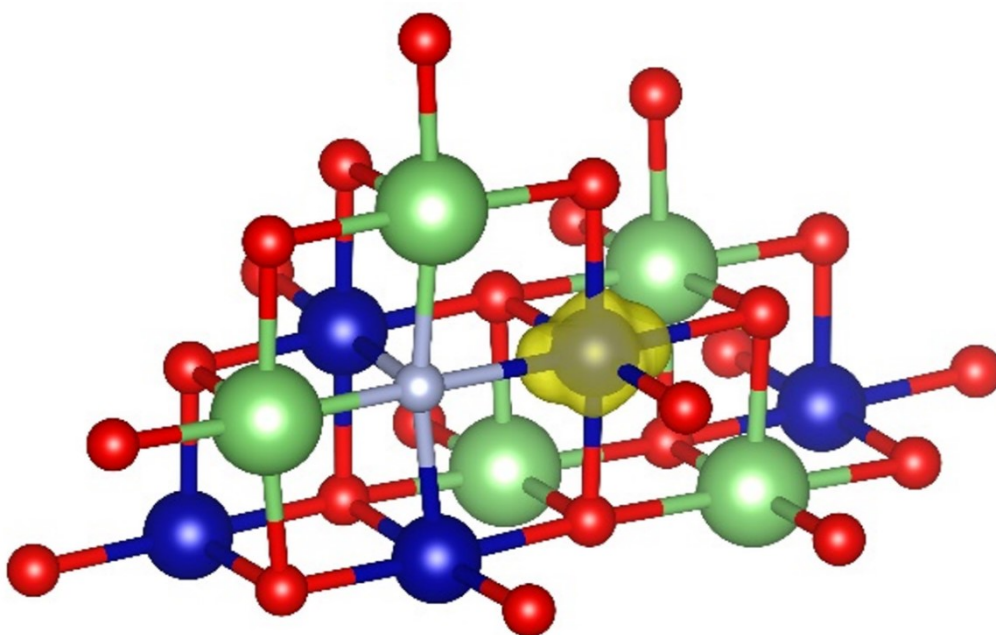

**Supplementary Figure 22** | Spin density of LCO bulk with one substituted F atom.

Spin-polarized area is represented by yellow color.

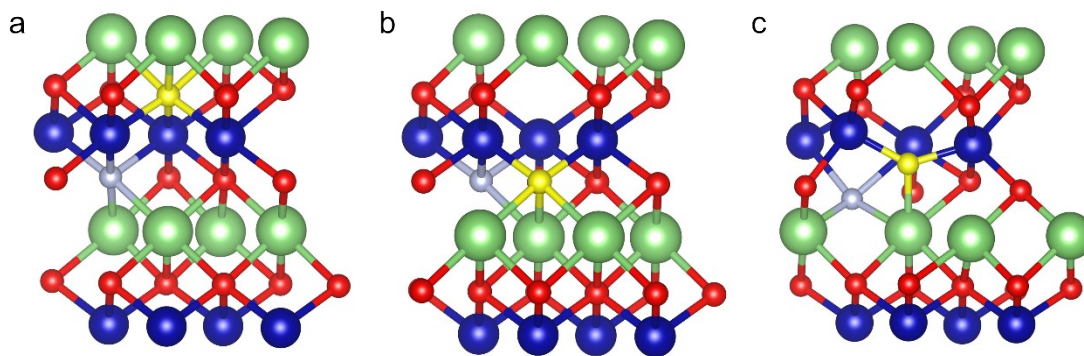

**Supplementary Figure 23| Diffusion pathway of O atom in bulk LCO with one substituted F atom.** (a) Initial state, (b) transition state, and (c) final state are depicted with Li, O, Co, and F atoms represented by green, red, blue, and light blue spheres, respectively. The diffused O atom is represented by the yellow sphere.

**Supplementary Table S1.** Performance comparison of cycling performance of our F-LCO with the reported 4.6 V LCO cathodes (vs. Li<sup>+</sup>/Li).

| Modification strategy                                                 | Rate<br>(C/mA g <sup>-1</sup> ) | Capacity                                    | Retention               | Refs. |
|-----------------------------------------------------------------------|---------------------------------|---------------------------------------------|-------------------------|-------|
| Hydrothermal assisted<br>Li/Al/F- modified LCO                        | 27.4                            | 171 mA h g <sup>-1</sup> after 200 cycles   | 82.2% after 200 cycles  | 5     |
| Ti/Al/Mg co-doped LCO                                                 | 137                             | 174 mA h g <sup>-1</sup> after 100 cycles   | 86% after 100 cycles    | 6     |
| Al/Ti bulk-doped and Mg<br>surface-doped LCO                          | 137                             | 170 mA h g <sup>-1</sup> after 200 cycles   | 80.2% after 200 cycles  | 7     |
| LiMn <sub>1.5</sub> Ni <sub>0.5</sub> O <sub>4</sub> coated LCO       | 50                              | 182 mA h g <sup>-1</sup> after 100 cycles   | 80.0% after 200 cycles  | 8     |
| AlZnO coated LCO                                                      | 185                             | 121 mA h g <sup>-1</sup> after 500 cycles   | 65.7% after 500 cycles  | 9     |
| LATP coated LCO                                                       | 137                             | 180 mA h g <sup>-1</sup> after 100 cycles   | 85.8% after 100 cycles  | 10    |
| P/Ni co-doped LCO                                                     | 137                             | 188 mA h g <sup>-1</sup> after 100 cycles   | 92.6% after 100 cycles  | 11    |
| Se surface-doped LCO                                                  | 70                              | 189 mA h g <sup>-1</sup> after 120 cycles   | 86.7% after 120 cycles  | 12    |
| Trace SO <sub>2</sub> in-situ modified<br>LCO                         | 280                             | 176 mA h g <sup>-1</sup> after 100 cycles   | 88% after 100 cycles    | 13    |
| Al and F gradient-doped<br>LCO                                        | 100                             | 170.8 mA h g <sup>-1</sup> after 200 cycles | 86.9% after 200 cycles  | 14    |
| Li-Al-PO <sub>4</sub> coated LCO                                      | 137                             | 180.4 mA h g <sup>-1</sup> after 200 cycles | 88.6 after 200 cycles   | 15    |
| LiAlH <sub>4</sub> treated LCO                                        | 190                             | 143.7 mA h g <sup>-1</sup> after 500 cycles | 71.6% after 500 cycles  | 16    |
| Co <sub>x</sub> B <sub>y</sub> coated Mg-doped LCO                    | 27 0                            | 185.5 mA h g <sup>-1</sup> after 100 cycles | 94.6% after 100 cycles  | 17    |
| Mg <sup>2+</sup> and (PO <sub>4</sub> ) <sup>3-</sup> co-doped<br>LCO | 270                             | 137.5 mA h g <sup>-1</sup> after 100 cycles | 82.4% after 1000 cycles | 18    |
| LiCoPO <sub>4</sub> coated LCO                                        | 2C/400                          | 153 mA h g <sup>-1</sup> after 1000 cycles  | 75% after 1000 cycles   | 19    |
| MgF <sub>2</sub> doped LCO                                            | 5C/1350                         | 130 mA h g <sup>-1</sup> after 1000 cycles  | 86.4% after 1000 cycles | 20    |
| V-doped LCO                                                           | 5C/1350                         | 110 mA h g <sup>-1</sup> after 200 cycles   | 93.4% after 200 cycles  | 21    |
| Se coated Mg-doped LCO                                                | 2C/400                          | 128 mA h g <sup>-1</sup> after 1000 cycles  | 68.5% after 1000 cycles | 22    |



| for charge<br>and<br>5C/1000<br>for<br>discharge |         |                                            |                         |              |
|--------------------------------------------------|---------|--------------------------------------------|-------------------------|--------------|
| Lathurized LCO                                   | 5C/1000 | 170 mA h g <sup>-1</sup> after 600 cycles, | 89.4% after 600 cycles, | 23           |
|                                                  |         | 167 mA h g <sup>-1</sup> after 100 cycles  | 99.0% after 100 cycles, |              |
|                                                  |         | 165 mA h g <sup>-1</sup> after 300 cycles  | 96.0% after 300 cycles, |              |
| F-LCO                                            | 3C/822  | 162 mA h g <sup>-1</sup> after 500 cycles  | 94.3% after 500 cycles, | This<br>work |
|                                                  |         | 159 mA h g <sup>-1</sup> after 700 cycles  | 94.3% after 700 cycles, |              |
|                                                  |         | 155 mA h g <sup>-1</sup> after 1000 cycles | 91.9% after 1000 cycles |              |

**Supplementary Table S2.** Doping element composition of commercial P-LCOs from ICP-OES.

| <b>Doping elements</b> | <b>Proportions (mol%)</b> |
|------------------------|---------------------------|
| Ti                     | 4.59                      |
| Mg                     | 0.16                      |
| Al                     | 0.61                      |
| B                      | 0.57                      |

## Supplementary references

1. G. K. a. J. Furthmüller, *Phys. Rev. B: Condens. Matter Mater. Phys.*, 1996, **54**, 11169–11186.
2. K. B. a. M. E. J. P. Perdew, *Phys. Rev. Lett.*, 1996, **77**, 3865-3868.
3. P. E. Blüochl, *Phys. Rev. B: Condens. Matter Mater. Phys.*, 1994, **50**, 17953-17979.
4. C. L. Sun, X. B. Liao, F. J. Xia, Y. Zhao, L. Zhang, S. Mu, S. S. Shi, Y. X. Li, H. Y. Peng, G. Van Tendeloo, K. N. Zhao and J. S. Wu, *ACS Nano*, 2020, **14**, 6181-6190.
5. J. Qian, L. Liu, J. Yang, S. Li, X. Wang, H. L. Zhuang and Y. Lu, *Nat. Commun.*, 2018, **9**, 4918.
6. J.-N. Zhang, Q. Li, C. Ouyang, X. Yu, M. Ge, X. Huang, E. Hu, C. Ma, S. Li, R. Xiao, W. Yang, Y. Chu, Y. Liu, H. Yu, X.-Q. Yang, X. Huang, L. Chen and H. Li, *Nat. Energy*, 2019, **4**, 594-603.
7. L. Wang, J. Ma, C. Wang, X. Yu, R. Liu, F. Jiang, X. Sun, A. Du, X. Zhou and G. Cui, *Adv. Sci.*, 2019, **6**, 1900355.
8. Z. Zhu, D. Yu, Z. Shi, R. Gao, X. Xiao, I. Waluyo, M. Ge, Y. Dong, W. Xue, G. Xu, W.-K. Lee, A. Hunt and J. Li, *Energy Environ. Sci.*, 2020, **13**, 1865-1878.
9. T. Cheng, Z. T. Ma, R. C. Qian, Y. T. Wang, Q. Cheng, Y. C. Lyu, A. M. Nie and B. K. Guo, *Adv. Funct. Mater.*, 2021, **31**, 2001974.
10. Y. Wang, Q. Zhang, Z. C. Xue, L. Yang, J. Wang, F. Meng, Q. Li, H. Pan, J. N. Zhang, Z. Jiang, W. Yang, X. Yu, L. Gu and H. Li, *Adv. Energy Mater.*, 2020, **10**, 2001413.
11. N. Qin, Q. Gan, Z. Zhuang, Y. Wang, Y. Li, Z. Li, H. Iftikhar, C. Zeng, G. Liu, Y. Bai, K. Zhang and Z. Lu, *Adv. Energy Mater.*, 2022, **12**, 2201549.
12. Z. Zhu, H. Wang, Y. Li, R. Gao, X. Xiao, Q. Yu, C. Wang, I. Waluyo, J. Ding, A. Hunt and J. Li, *Adv. Mater.*, 2020, **32**, e2005182.
13. X. Tan, T. Zhao, L. Song, D. Mao, Y. Zhang, Z. Fan, H. Wang and W. Chu, *Adv. Energy Mater.*, 2022, **12**, 2200008.
14. W. Huang, Q. Zhao, M. Zhang, S. Xu, H. Xue, C. Zhu, J. Fang, W. Zhao, G. Ren, R. Qin, Q. Zhao, H. Chen and F. Pan, *Adv. Energy Mater.*, 2022, **12**, 2200813.
15. X. Wang, Q. Wu, S. Li, Z. Tong, D. Wang, H. L. Zhuang, X. Wang and Y. Lu, *Energy Storage Mater.*, 2021, **37**, 67-76.
16. P. Wang, Y. Meng, Y. Wang, L. Chen, Z. Zhang, W. Pu, J. Li, C. Yang and D. Xiao, *Energy Storage Mater.*, 2022, **44**, 487-496.
17. J. Chen, H. Chen, S. Zhang, A. Dai, T. Li, Y. Mei, L. Ni, X. Gao, W. Deng, L. Yu, G. Zou, H. Hou, M. Dahbi, W. Xu, J. Wen, J. Alami, T. Liu, K. Amine and X. Ji, *Adv. Mater.*, 2022, **34**, 2204845.
18. W. Kong, D. Zhou, Q. Zhang, D. Wong, K. An, C. Schulz, N. Zhang, J. Zhang and X. Liu, *Adv. Funct. Mater.*, 2022, **33**, 2211033.
19. X. R. Yang, C. W. Wang, P. F. Yan, T. P. Jiao, J. L. Hao, Y. Y. Jiang, F. C. Ren, W. G. Zhang, J. M. Zheng, Y. Cheng, X. S. Wang, W. Yang, J. P. Zhu, S. Y. Pan, M. Lin, L. Y. Zeng, Z. L. Gong, J. T. Li and Y. Yang, *Adv. Energy Mater.*, 2022, **12**, 2200197.
20. W. Kong, J. Zhang, D. Wong, W. Yang, J. Yang, C. Schulz and X. Liu, *Angew. Chem., Int. Ed.*, 2021, **60**, 27102-27112.
21. W. J. Kong, D. Wong, K. An, J. C. Zhang, Z. H. Chen, C. Schulz, Z. J. Xu and X. F. Liu, *Adv. Funct. Mater.*, 2022, **32**, 2202679.
22. A. Fu, Z. Zhang, J. Lin, Y. Zou, C. Qin, C. Xu, P. Yan, K. Zhou, J. Hao, X. Yang, Y. Cheng, D.-

- Y. Wu, Y. Yang, M.-S. Wang and J. Zheng, *Energy Storage Mater.*, 2022, **46**, 406-416.
23. M. Z. Cai, Y. H. Dong, M. Xie, W. J. Dong, C. L. Dong, P. Dai, H. Zhang, X. Wang, X. Z. Sun, S. N. Zhang, M. Yoon, H. W. Xu, Y. S. Ge, J. Li and F. Q. Huang, *Nat. Energy*, 2023, **8**, 159-168.
